# Supplementary material for: Ouabain Induces Transcript Changes and Activation of RhoA/ROCK Signaling in Cultured Epithelial Cells (MDCK)
Source: MDPI journal article supplement (doi:10.3390/cimb45090475), 2023-09-14
Supplement: s1 [file s1]

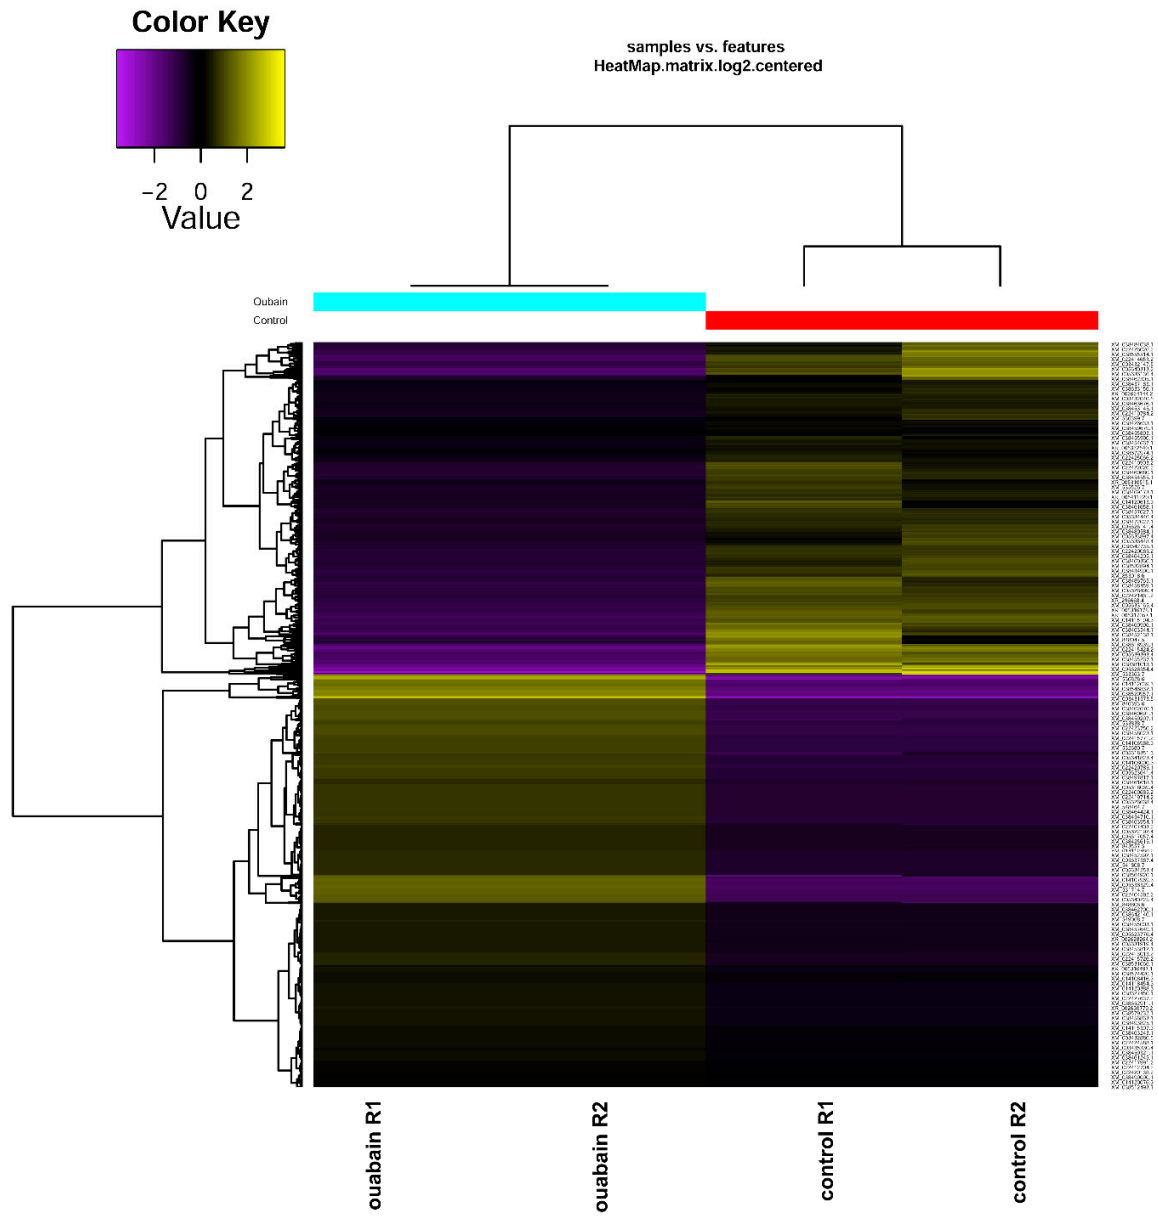

**Figure S1.** A more detailed version of the Heatmap figure shown in the manuscript (Figure 1D), which depicts the accession name of all genes whose expression level was modified by ouabain. Including upregulated (gold) and downregulated (purple).
